# Supplementary material
Source: Springer Nature journal article supplement (https://www.springermedizin.de/resource/supplementary/12879_2009_1069_MOESM5_ESM.pdf/9442514)

### Participation rate

**A**

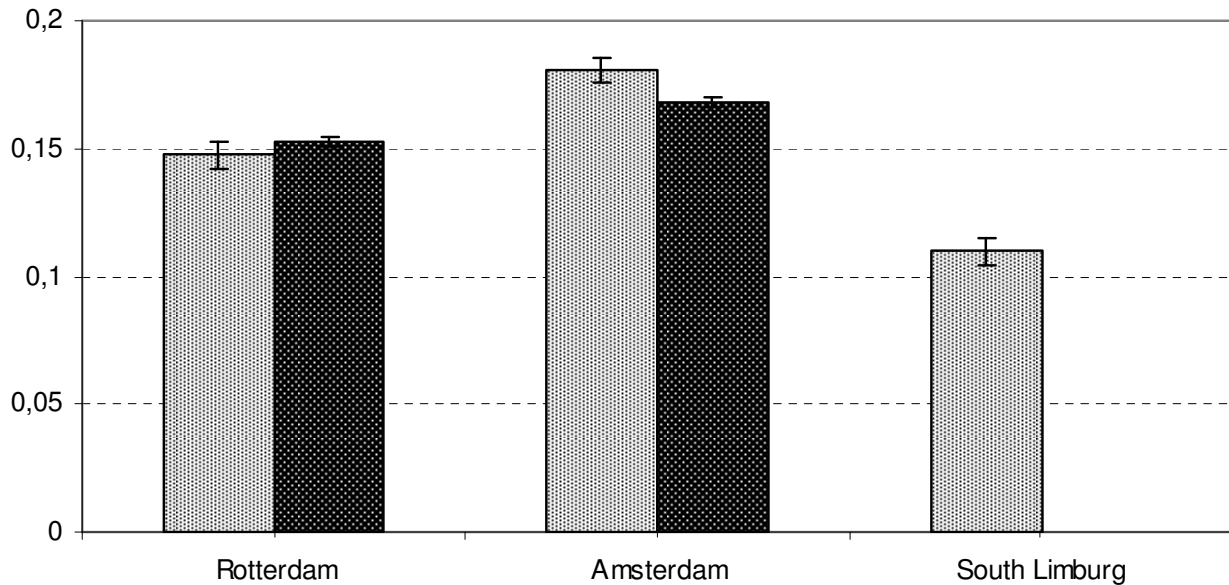

### Positivity rate

**B**

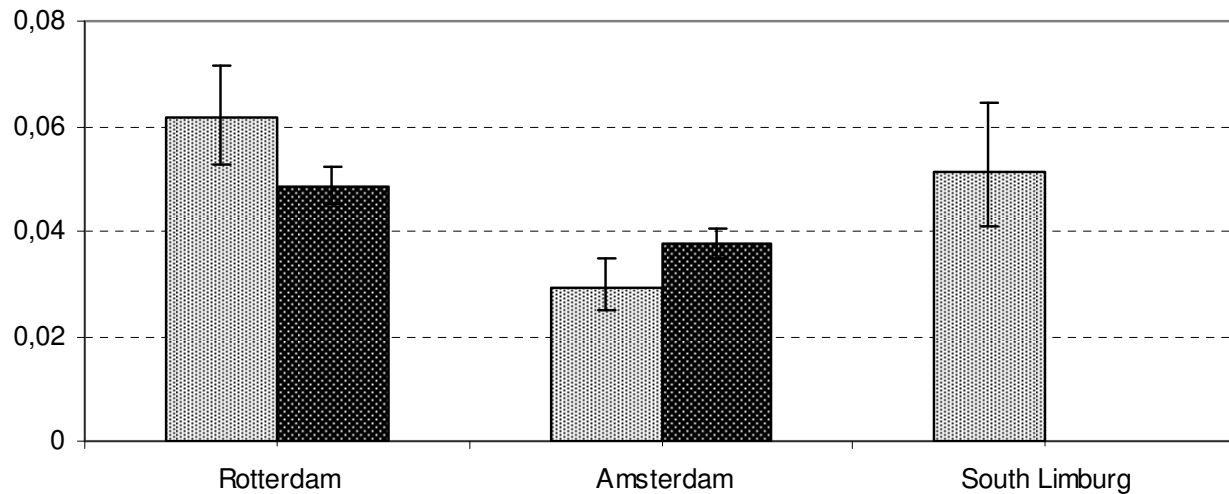

Block A Block B

Supplement: MOESM5 [file 9442514]
